# Supplementary material for: Reduced light absorption of black carbon (BC) and its influence on BC-boundary-layer interactions during “APEC Blue”
Source: Copernicus journal article supplement (doi:10.5194/acp-21-11405-2021), 2021-07-29
Supplement: Supplementary file 1 [file acp-21-11405-2021-supplement.pdf]

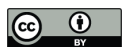

*Supplement of*

## **Reduced light absorption of black carbon (BC) and its influence on BC-boundary-layer interactions during “APEC Blue”**

**Meng Gao et al.**

*Correspondence to:* Meng Gao ([mmgao2@hkbu.edu.hk](mailto:mmgao2@hkbu.edu.hk)) and Jianlin Hu ([jianlinhu@nuist.edu.cn](mailto:jianlinhu@nuist.edu.cn))

The copyright of individual parts of the supplement might differ from the article licence.

Table S1. Complex refractive index for major aerosol components in WRF-Chem

| Components                       | real | imaginary |
|----------------------------------|------|-----------|
| BC                               | 1.85 | 0.71      |
| Dust                             | 1.55 | 0.006     |
| Organics                         | 1.45 | 0         |
| NH <sub>4</sub> Cl               | 1.50 | 0         |
| NH <sub>4</sub> NO <sub>3</sub>  | 1.50 | 0         |
| NH <sub>4</sub> HSO <sub>4</sub> | 1.47 | 0         |
| NA <sub>2</sub> SO <sub>4</sub>  | 1.50 | 0         |

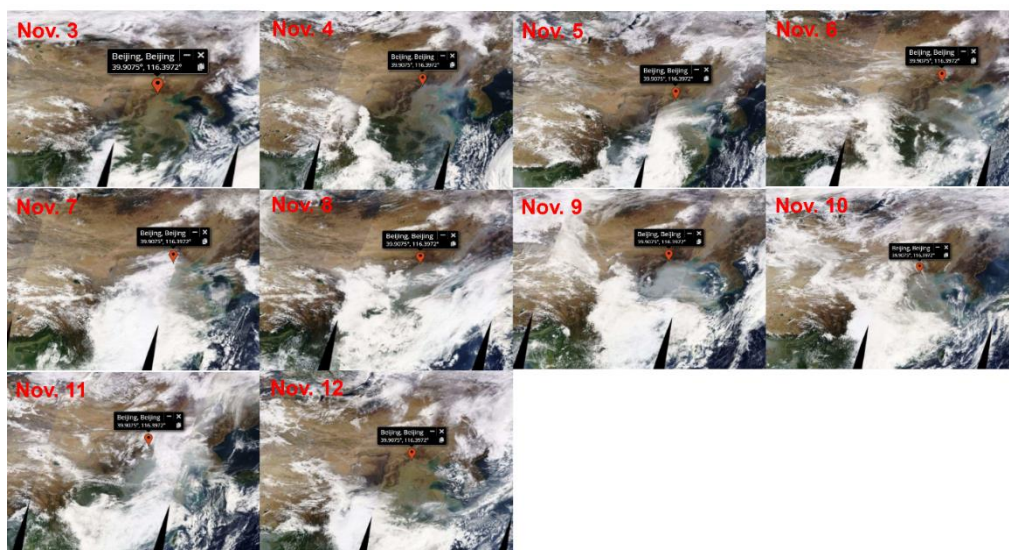

Figure S1. Satellite monitored clouds over East Asia during the APEC week (Terra/MODIS corrected Reflectance obtained from <https://worldview.earthdata.nasa.gov/>).

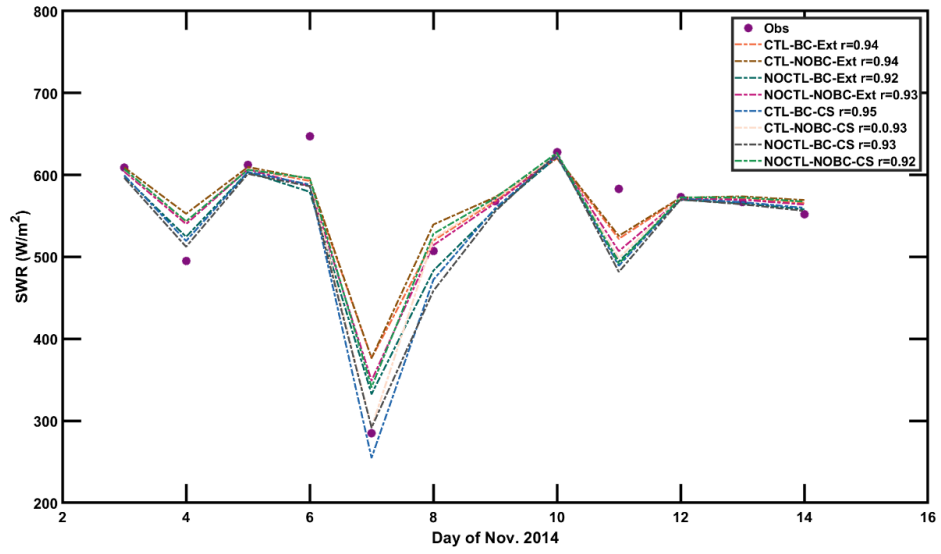

Figure S2. Observed and modelled daily maximum near ground radiation in Beijing during the APEC week.
